# Supplementary material
Source: PubMed Central journal article supplement (PMC4880369)
Supplement: NIHMS775017-supplement-appendix_figure_3.pdf [file NIHMS775017-supplement-appendix_figure_3.pdf]

## Without LMWH

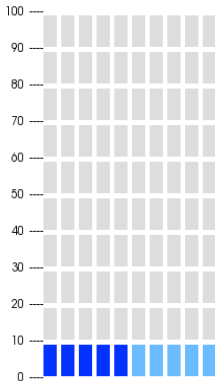

If 100 women like you do not take LMWH

Between 5-10 women will experience a blood clot as indicated by the blue rectangles

Since 5-10 women will experience a blood clot, that means between 90-95 will not

## With LMWH

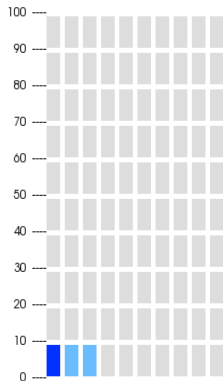

If 100 women like you take LMWH

Between 1-3 women will experience a blood clot as indicated by the blue rectangles

Since 1-3 women will experience a blood clot, that means between 97-99 will not

There may be an increase in the risk of major bleeding, osteoporosis, and heparin-induced thrombocytopenia with preventative blood thinning. If there is an increased risk, it is likely to be very small and less than 1 in 100.
