# Supplementary material
Source: PubMed Central journal article supplement (PMC4880369)

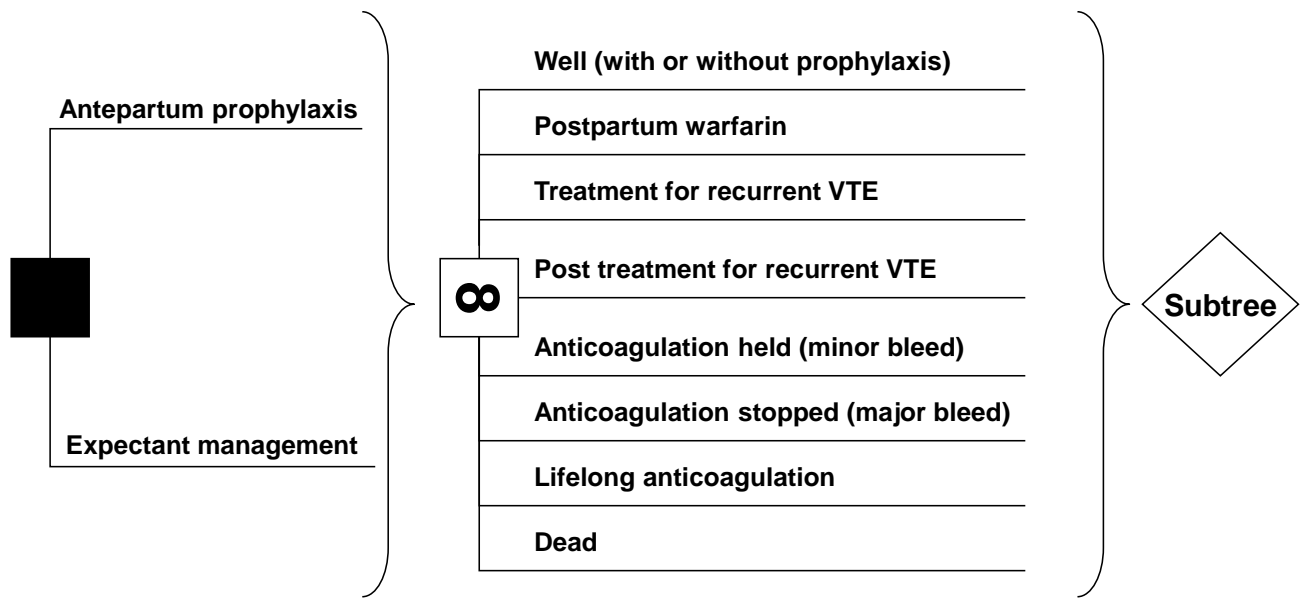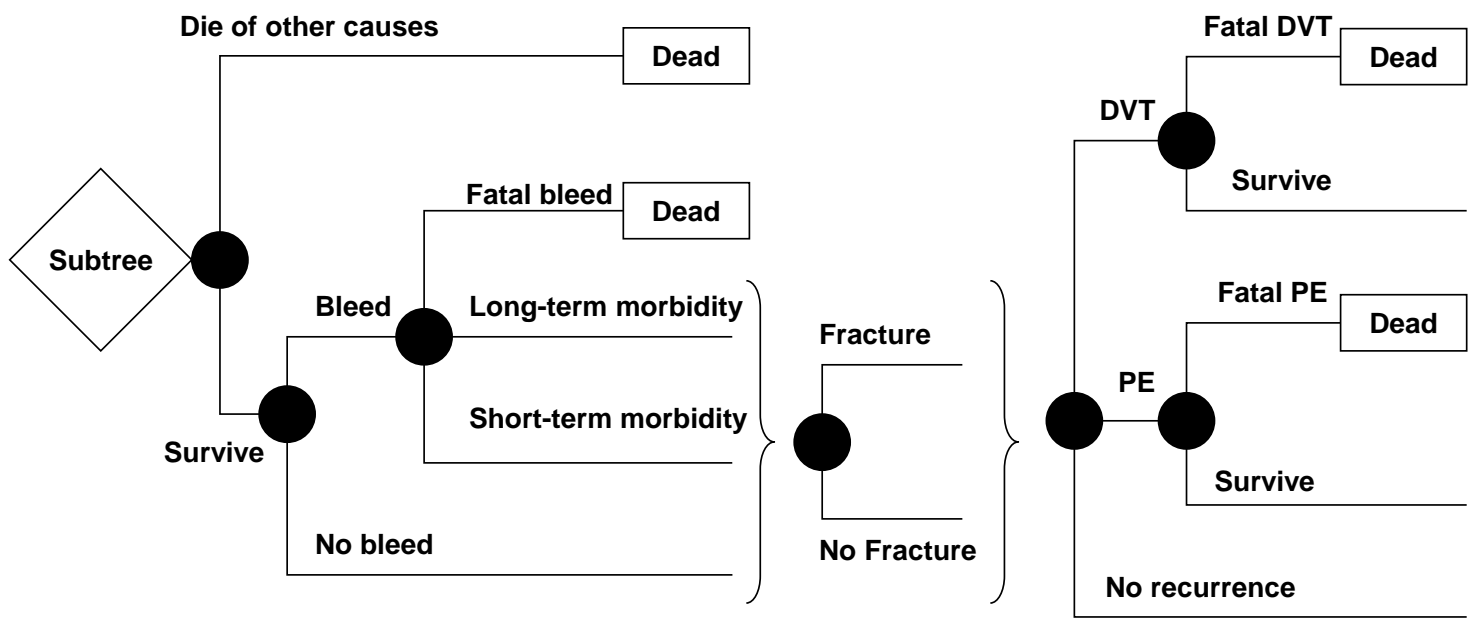

Supplement: NIHMS775017-supplement-appendix_figure_1.pdf [file NIHMS775017-supplement-appendix_figure_1.pdf]

# Comparison of Patient Choice and Decision Model Recommendation

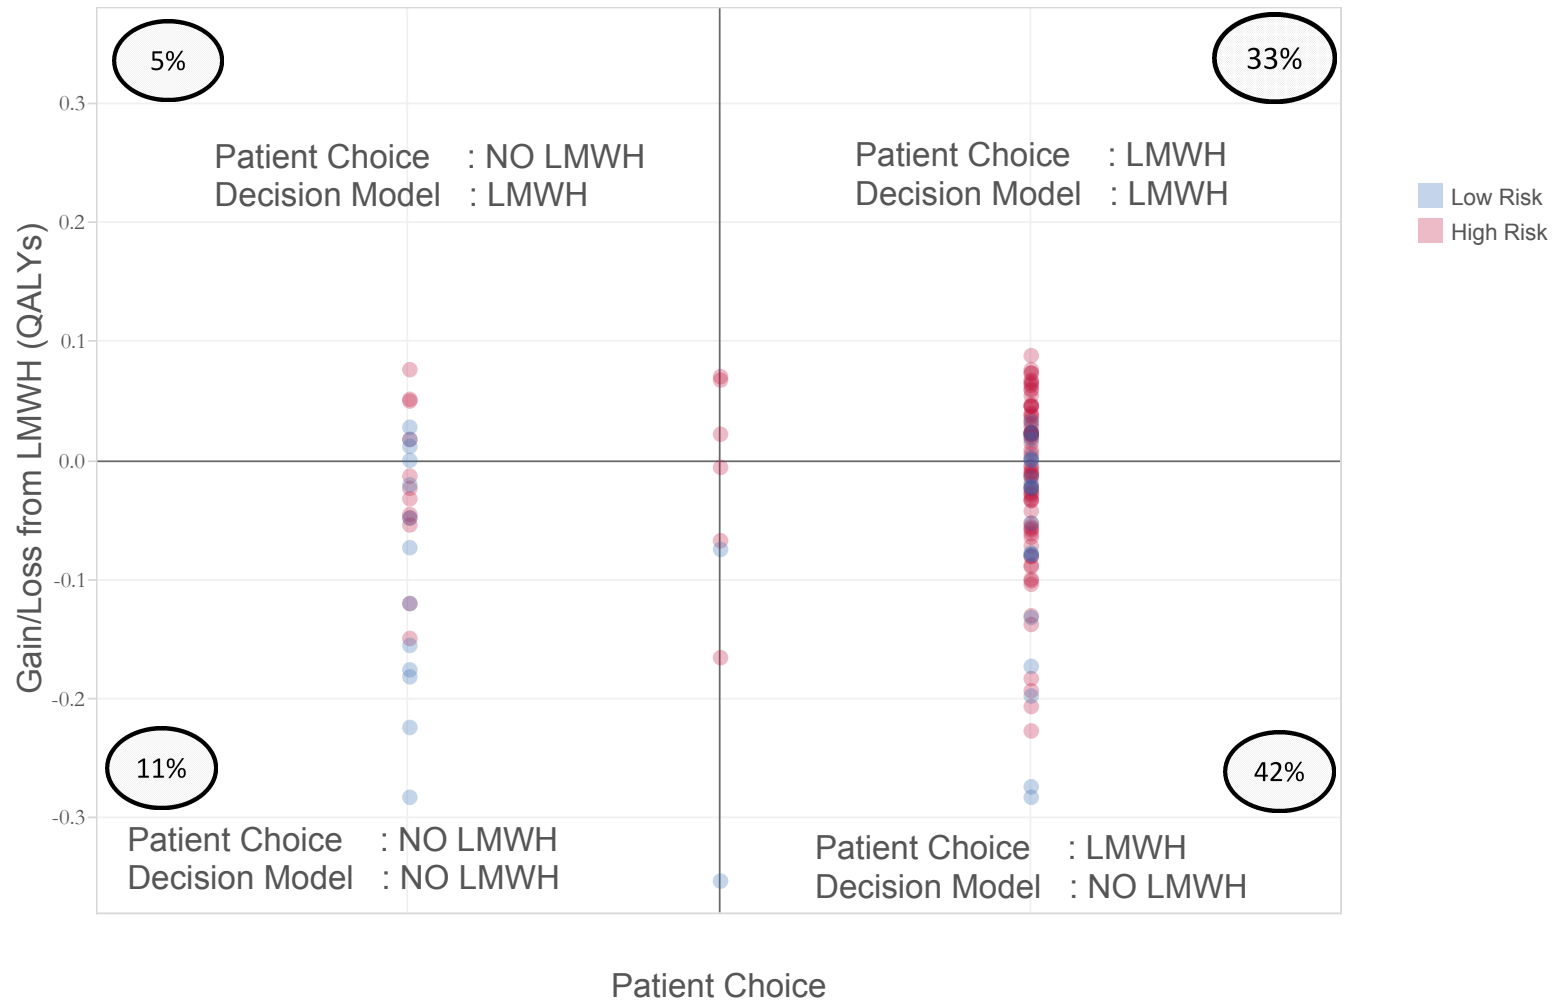

Supplement: NIHMS775017-supplement-appendix_figure_2.pdf [file NIHMS775017-supplement-appendix_figure_2.pdf]
